# Supplementary material for: Production of methyl vinyl ketone and methacrolein via the hydroperoxyl pathway of isoprene oxidation
Source: Copernicus journal article supplement (doi:10.5194/acp-13-5715-2013), 2013-06-14
Supplement: Supplementary file 1 [file acp-13-5715-2013-supplement.pdf]

**Supplementary Material for**  
**Production of methyl vinyl ketone and methacrolein via the hydroperoxyl**  
**pathway of isoprene oxidation**

by

Y. J. Liu (1), I. Herdinger-Blatt (1,2), K. A. McKinney\* (3), and S.T. Martin\* (1,4)

(1) School of Engineering and Applied Sciences, Harvard University, Cambridge, Massachusetts,  
USA

(2) Institute of Ion Physics and Applied Physics, University of Innsbruck, Innsbruck, Austria

(3) Department of Chemistry, Amherst College, Amherst, Massachusetts, USA

(4) Department of Earth and Planetary Sciences, Harvard University, Cambridge, Massachusetts,  
USA

*E-mail: kamckinney@amherst.edu*

*scot\_martin@harvard.edu*

*<http://www.seas.harvard.edu/environmental-chemistry>*

\*To Whom Correspondence Should be Addressed

## A. Calibration of NO<sub>x</sub> analyzer

The instrument background in the absence of NO was obtained by converting NO to NO<sub>2</sub> in the dry air from the pure air generator with additional ozone immediately before the NO detector. The instrument sensitivity of NO was obtained by repeated calibration with NO standard diluted with dry air and the instrumental sensitivity of NO<sub>2</sub> was obtained by converting NO to NO<sub>2</sub> with additional ozone. The signals of NO and NO<sub>x</sub> of the dry air from pure air generator had no significant difference from instrument background.

## B. PTR-TOF-MS data analysis routine

### (1) Peak shape fitting

A numerical peak shape was generated for each 6-min sum spectrum as described in the main text. No significant change of peak shape was observed within any one HDF file we have collected, which was usually for less than 12 hr. Therefore, an averaged numeric peak shape was used for each signal HDF file. The shape-fitting peaks used for the NO<sup>+</sup> mode include H<sub>3</sub>O<sup>+</sup> ( $m/z = 19.0178$  Th), NO<sub>2</sub><sup>+</sup> ( $m/z = 45.9924$  Th) and C<sub>5</sub>H<sub>8</sub><sup>+</sup> ( $m/z = 68.0621$  Th, only for chamber steady-state conditions). For the H<sub>3</sub>O<sup>+</sup> mode, H<sub>3</sub><sup>18</sup>O<sup>+</sup> ( $m/z = 21.0221$  Th), NO<sup>+</sup> ( $m/z = 29.9974$  Th) and H<sub>5</sub>O<sup>18</sup>O<sup>+</sup> ( $m/z = 39.0327$  Th) were used.

### (2) Mass calibration

Using a generated peak shape, a peak fitting algorithm was then applied to a list of mass calibration peaks to optimize the time-of-flight of their peak maximum. In the case of NO<sup>+</sup> mode, the mass calibration peaks included H<sub>3</sub>O<sup>+</sup>, NO<sub>2</sub><sup>+</sup>, H<sub>2</sub>NO<sub>2</sub><sup>+</sup> ( $m/z = 48.0080$  Th), and C<sub>5</sub>H<sub>8</sub><sup>+</sup> (only for chamber steady-state conditions). For H<sub>3</sub>O<sup>+</sup> mode, the mass calibration peaks included H<sub>3</sub>O<sup>18+</sup>, NO<sup>+</sup>, H<sub>5</sub>O<sup>18</sup>O<sup>+</sup>, NO<sub>2</sub><sup>+</sup> ( $m/z = 45.9924$  Th) and H<sub>7</sub>O<sub>3</sub><sup>+</sup> ( $m/z = 55.0390$  Th). The

relationship of the time-of-flight and the mass-to-charge ratio ( $m/z$ ) was calculated according to the following equation by fitting the coefficients  $\alpha$  and  $\beta$ :

$$m/z = \left( \frac{\text{TOF} - \beta}{\alpha} \right)$$

The mass calibration peaks covered only the  $m/z$  range below 70 Th, but the  $m/z$  of the ions generated from isoprene oxidation products were expected to be as high as 120 Th. To examine whether this could be a source of inaccuracy for mass calibration, an external mass calibration compound, 1,4-dichlorobenzene, was added. The product ions of 1,4-dichlorobenzene  $\text{C}_6\text{H}_4\text{Cl}_2^+$  ( $m/z = 145.968$ ) and  $\text{C}_6\text{H}_4\text{Cl}_2\text{NO}^+$  ( $m/z = 175.966$ ) were used for the mass calibration at the  $\text{NO}^+$  mode. For the  $\text{H}_3\text{O}^+$  mode,  $\text{C}_6\text{H}_5\text{Cl}_2^+$  ( $m/z = 146.976$ ) was used. The deviation of the mass calibration curve obtained with and without 1,4-dichlorobenzene ions was below 5 ppm for both modes in the  $m/z$  range below 150 Th. Therefore, the mass calibration without adding external calibration compound worked well for the interested mass range.

### (3) Peak assignment

With a good mass calibration and a well-defined peak shape, we then assigned ion formula for the peaks in the full  $m/z$  range. A pre-existing ion list was created, containing all possible combination of C, H, O, N, and their important isotopes for  $m/z < 200$  Th. A target peak was first fitted using the ion with an  $m/z$  ratio most close to the peak maximum. If there was a significant residual peak left, a second ion with an  $m/z$  ratio most close to the residual peak maximum was added into the fitting procedure. The peak assignment process was done manually to avoid missing any shoulder peaks.

#### (4) Signal analysis

For signal analysis, peak fitting algorithm was applied on the target peaks using pre-assigned ion formulas. The resulting peak signal (cps) were normalized to a primary ion signal of  $10^6$  cps without transmission correction (cps  $\rightarrow$  ncps), as described by de Gouw et al. (2003)

#### **C. Wall-loss experiment**

Separate chamber experiments were performed to test the wall loss of isoprene, MVK and MACR. The target species were continuously injected into the chamber bag using syringe pump until their concentrations got stabilized. Inflows and injection were then stopped for 2 hr. At the same time the gas-phase concentrations of the target species were continuously measured. No drop in the signal of ISOP, MVK, and MACR was observed, suggesting negligible wall loss at steady state.

#### **D. Dependence of the sensitivities on the $E/N$ ratio**

The influence of electric field ( $E/N$  ratio) on the sensitivity response of ISOP, MVK, and MACR for the  $\text{NO}^+$  mode is illustrated in Figure S3. The sensitivities of the three compounds decreased for increasing  $E/N$ . The ratio of  $\text{C}_4\text{H}_6\text{O}\cdot\text{NO}^+/\text{C}_4\text{H}_5\text{O}^+$  ion signals for MACR also decreased for increasing  $E/N$ . To ensure better separation of MACR from MVK which only produced  $\text{C}_4\text{H}_6\text{O}\cdot\text{NO}^+$  ions and at the same time high sensitivities for both species, the drift tube voltage was kept at 300 V and drift tube temperature at 60 °C during chamber experiments, corresponding to an  $E/N$  ratio of 68 Td.

As shown in Figure S3, at lower  $E/N$  ratios smaller changes in the sensitivity of isoprene were observed. A similar trend was also observed by Knighton et al. (2009) and Karl et al.

(2012). As a comparison point, the sensitivity in the present work of isoprene was 14.6 ncps ppb<sup>-1</sup> for an  $E/N$  ratio of 104 Td. This sensitivity is close to the value of 12.5 ncps ppb<sup>-1</sup> obtained by Karl et al. using a similar PTR-TOF-MS instrument estimated from Figure 3 in that paper. This value is, however, significantly lower than that of 21 ncps ppb<sup>-1</sup> obtained by Knighton et al. using a PTR-QMS instrument, as estimated from Figure 4 in that paper.

### E. Equations for concentration quantification

Concentrations of ISOP, MVK, and MACR in the chamber outflow were quantified using the following equations:

$$[\text{Isoprene}] = \frac{i[\text{C}_5\text{H}_8^+] - i[\text{C}_5\text{H}_8^+]_{bg}}{s[\text{C}_5\text{H}_8^+, \text{Isoprene}]} \quad (\text{S1})$$

$$[\text{MACR}] = \frac{i[\text{C}_4\text{H}_5\text{O}^+] - i[\text{C}_4\text{H}_5\text{O}^+]_{bg} - 0.011 (i[\text{C}_5\text{H}_8^+] - i[\text{C}_5\text{H}_8^+]_{bg})}{s[\text{C}_4\text{H}_5\text{O}^+, \text{MACR}]} \quad (\text{S2})$$

$$[\text{MVK}] = \frac{i[\text{C}_4\text{H}_6\text{O} \cdot \text{NO}^+] - i[\text{C}_4\text{H}_5\text{O}^+]_{bg} - s[\text{C}_4\text{H}_6\text{O} \cdot \text{NO}^+, \text{MACR}] c[\text{MACR}]}{s[\text{C}_4\text{H}_6\text{O} \cdot \text{NO}^+, \text{MVK}]} \quad (\text{S3})$$

where  $[M]$  was the concentration of species  $M$  in the chamber air,  $i[\text{N}^+]$  (cps) was the measured signal of ion  $\text{N}^+$  for chamber air,  $i[\text{N}^+]_{bg}$  (cps) was the measured background signal of ion  $\text{N}^+$  using zero air, and  $s[\text{N}^+, M]$  (cps ppb<sup>-1</sup>) was the sensitivity of compound  $M$  with respect to ion  $\text{N}^+$ , as determined by calibration. A small amount of  $\text{C}_4\text{H}_5\text{O}^+$  was also produced from isoprene (1.1% of  $\text{C}_5\text{H}_8^+$  ion), which was taken into account in converting ion signals to concentrations.

## F. Equation for yield determination with ozone correction

$$0 = \left( Y_{MVK} k_{ISOP+OH} [OH]_{ss} [ISOP]_{ss} + Y_{MVK,O_3} k_{ISOP+O_3} [O_3]_{ss} [ISOP]_{ss} \right)_{sources} - \left( k_{MVK+OH} [OH]_{ss} [MVK]_{ss} + k_{MVK+O_3} [O_3]_{ss} [MVK]_{ss} + \frac{1}{\tau} [MVK]_{ss} + k_{wall} [MVK]_{ss} \right)_{sinks} \quad (S4)$$

$$Y_{MVK} = \frac{(k_{MVK+OH} [OH]_{ss} + k_{MVK+O_3} [O_3]_{ss} + 1/\tau + k_{wall}) [MVK]_{ss}}{k_{ISOP+OH} [OH]_{ss} [ISOP]_{ss} - \frac{Y_{MVK,O_3} k_{ISOP+O_3} [O_3]_{ss} [ISOP]_{ss}}{k_{ISOP+OH} [OH]_{ss} [ISOP]_{ss}}} \quad (S5)$$

$$0 = \left( \frac{1}{\tau} [ISOP]_{in} \right)_{sources} - \left( k_{ISOP+OH} [OH]_{ss} [ISOP]_{ss} + k_{ISOP+O_3} [O_3]_{ss} [ISOP]_{ss} + \frac{1}{\tau} [ISOP]_{ss} \right)_{sinks} \quad (S6)$$

where  $k_{ISOP+O_3}$  and  $k_{MVK+O_3}$  are the reaction rate coefficients of ISOP and MVK with  $O_3$  and  $Y_{MVK,O_3}$  is the yield of MVK from ozonolysis of isoprene.

## H. Dependence of the interference on instrumental conditions

To understand whether thermal decomposition of the condensing compounds, possibly ISOPOOH, occurred in the instrument (60 °C), the change in ion signals of steady-state chamber air was monitored at a low drift tube temperature of 30 °C as the inlet temperature was varied from 30 °C to 80 °C. The trap temperature was kept at 25 °C. The residence times of the sample air in the drift tube and in the inlet line were about the same (60-80 ms). No significant change in ion signals was observed, suggesting that thermal decomposition of other oxidation products inside the instrument did not contribute to the ions at the same  $m/z$  ratio as MVK and MACR product ions.

Measurements of steady-state chamber air were made at various  $E/N$  ratios in both the  $\text{NO}^+$  and  $\text{H}_3\text{O}^+$  modes. The apparent concentrations of ISOP, MVK, and MACR were quantified with respective calibrations at each  $E/N$  ratio. Here the apparent concentrations are defined as the equivalent concentrations of ISOP, MVK, and MACR assuming no interference compounds. As shown in the top panels of Figure S10, the apparent MVK and MACR concentrations were independent of the  $E/N$  ratio in the range of 15-70 Td in the  $\text{NO}^+$  mode and 20-120 Td in the  $\text{H}_3\text{O}^+$  mode. This observation indicates that the fragmentation of the interference compounds was not sensitive to the collision energies used.

As shown in the bottom panels of Figure S10, the apparent concentrations of MVK and MACR decreased somewhat as the temperature of the drift tube decreased. The apparent concentrations were quantified using respective calibrations at each temperature. The decrease of the apparent concentration of MVK + MACR in  $\text{NO}^+$  mode was greater than that of the  $\text{H}_3\text{O}^+$  mode. This observation suggests that the fragmentation of the condensing compounds was thermally driven, which at first seems inconsistent with the independence of the  $E/N$  ratio. Further investigation is hence needed to fully understand the mechanism.

## Reference

- de Gouw, J., Warneke, C., Karl, T., Eerdekens, G., van der Veen, C., and Fall, R.: Sensitivity and specificity of atmospheric trace gas detection by proton-transfer-reaction mass spectrometry, *Int. J. Mass. Spectrom.*, 223-224, 365-382, doi: 10.1016/s1387-3806(02)00926-0, 2003.
- Karl, T., Hansel, A., Cappellin, L., Kaser, L., Herdinger-Blatt, I., and Jud, W.: Selective measurements of isoprene and 2-methyl-3-buten-2-ol based on  $\text{NO}^+$  ionization mass spectrometry, *Atmos. Chem. Phys.*, 12, 11877-11884, doi: 10.5194/acp-12-11877-2012, 2012.

Knighton, W. B., Fortner, E. C., Herndon, S. C., Wood, E. C., and Miake-Lye, R. C.: Adaptation of a proton transfer reaction mass spectrometer instrument to employ  $\text{NO}^+$  as reagent ion for the detection of 1,3-butadiene in the ambient atmosphere, *Rapid. Commun. Mass. Sp.*, 23, 3301-3308, doi: 10.1002/rcm.4249, 2009.



**Table S1.** Uncertainty Analysis of MVK and MACR yield in Experiment #1 <sup>[1]</sup>

| Input Variables <sup>[2]</sup>                 |             |                                                                                                            |               | Output Variables <sup>[2]</sup>                     |           |           |           |
|------------------------------------------------|-------------|------------------------------------------------------------------------------------------------------------|---------------|-----------------------------------------------------|-----------|-----------|-----------|
| Concentrations (ppb) <sup>[3]</sup>            |             | Reaction rate coefficient, $k$<br>(molecule <sup>-1</sup> cm <sup>3</sup> s <sup>-1</sup> ) <sup>[4]</sup> |               | Others                                              |           | Yield (%) |           |
| [C <sub>5</sub> H <sub>8</sub> ] <sub>in</sub> | 59.3 ± 2.4  | log <sub>10</sub> ( $k_{\text{C}_5\text{H}_8+\text{OH}}$ )                                                 | -10.00 ± 0.06 | $\tau$ (hr) <sup>[5]</sup>                          | 3.7 ± 0.2 | MACR      | 3.2 ± 0.6 |
| [C <sub>5</sub> H <sub>8</sub> ] <sub>ss</sub> | 16.0 ± 0.6  | log <sub>10</sub> ( $k_{\text{MACR}+\text{OH}}$ )                                                          | -10.54 ± 0.10 | $k_{\text{wall}}$ (s <sup>-1</sup> ) <sup>[6]</sup> | 0         | MVK       | 4.6 ± 0.7 |
| [MACR] <sub>ss</sub>                           | 0.79 ± 0.10 | log <sub>10</sub> ( $k_{\text{MVK}+\text{OH}}$ )                                                           | -10.70 ± 0.10 |                                                     |           |           |           |
| [MVK] <sub>ss</sub>                            | 1.29 ± 0.14 |                                                                                                            |               |                                                     |           |           |           |

<sup>[1]</sup> A Monte Carol method was used for error analysis. All the input variables in Equation 2-3 were taken into consideration (cf. Equation 1-3 for the definitions of the input variables).

<sup>[2]</sup> (Mean ± 2 × Standard Deviation) for all the input and output values.

<sup>[3]</sup> Uncertainties in concentrations were determined by calibrations.

<sup>[4]</sup> Reaction rate coefficients and their uncertainties were from IUPAC recommendation in common logarithm.

<sup>[5]</sup> A 6% 2 $\sigma$ -uncertainty was used for the chamber residence time based on the standard deviation in measured residence times for multiple experiments.

<sup>[6]</sup> A value of  $k_{\text{wall}} = 0 \text{ s}^{-1}$  was used based on the results of wall-loss experiments (cf. supplementary material).

## List of Figures

- Figure S1.** Schematic diagram of the Harvard Environmental Chamber.
- Figure S2.** Mechanism of isoprene oxidation to produce ISOPOOH and IEPOX as represented in MCM v3.2. Branching ratios to specific products are shown in parentheses.
- Figure S3.** Dependence of sensitivity of isoprene, MVK, and MACR on E/N ratios in  $\text{NO}^+$  mode. The drift tube temperature was kept at 70 °C.
- Figure S4.** Probability density functions of the yield of MVK (left panel) and MACR (right panel) for Experiment #1 estimated from Monte Carlo simulations. The distribution is approximated using normal distribution (red line).
- Figure S5.** Change in NO,  $\text{NO}_x$  (top panel) and PTR ion signals (bottom panel) after adding 0.5 ppb NO into the chamber inflow at the steady state of a  $\text{HO}_2$ -dominant experiment. The experimental condition was the same as Experiment #1. The PTR signals were measured at a trap temperature of 25 °C in  $\text{NO}^+$  mode.
- Figure S6.** Spectrum comparison of  $\text{PANH}^+$  in  $\text{HO}_2$ -dominant (#1) and NO-dominant (#7) experiments. The PTR spectrum were measured at a trap temperature of 25 °C in  $\text{H}_3\text{O}^+$  mode and averaged for 24 mins.
- Figure S7.** Probability density functions of the yields of MVK (top left panel) and MACR (top right panel) via the  $\text{HO}_2$  pathway and  $k'$  (bottom panels) estimated from Monte Carlo simulations (cf. Equation 6 for definition of  $k'$ ). Red lines show the approximations of the ensemble of results using normal distribution.  $k'$  follows lognormal distribution (bottom right panel).
- Figure S8.** Change in the signal of selected ion for steady-state chamber air measured with  $\text{H}_3\text{O}^+$  reagent ions as the trap temperature dropped from room temperature to -

40 °C in discrete steps. Left column shows the time series of temperature (top) and of ion signals (bottom) in Experiment #1 under HO<sub>2</sub>-dominant conditions, and right column shows results for Experiment #7 under NO-dominant conditions. Solid line and dashed line in the bottom panels represent the ion signal of C<sub>5</sub>H<sub>9</sub><sup>+</sup> and C<sub>4</sub>H<sub>7</sub>O<sup>+</sup>, respectively.

**Figure S9.** Change in the equivalent concentrations of the interference compounds to MVK and MACR with chamber residence time. The equivalent concentration of MVK/MACR interferences is defined as the difference of MVK/MACR concentration at the trap temperature of +25 °C and that at -40 °C. The residence time of reference experiment was 3.7 hr.

**Figure S10.** Change in the apparent concentrations of isoprene, MVK, and MACR at steady state with the E/N ratios (top) and the drift-tube temperature (bottom) in both NO<sup>+</sup> (left) and H<sub>3</sub>O<sup>+</sup> (right) mode. For the H<sub>3</sub>O<sup>+</sup> mode, the combined concentration of MVK and MACR was calculated using the average sensitivity of MVK and MACR. The trap temperature was kept at +25 °C. For the experiments at various E/N ratios, the drift tube temperature was kept on 70 °C and the drift tube voltage was varied. For the experiments at various temperatures of the drift tube, the drift tube voltage was 300 V and 520 V for the NO<sup>+</sup> and H<sub>3</sub>O<sup>+</sup> modes, respectively.

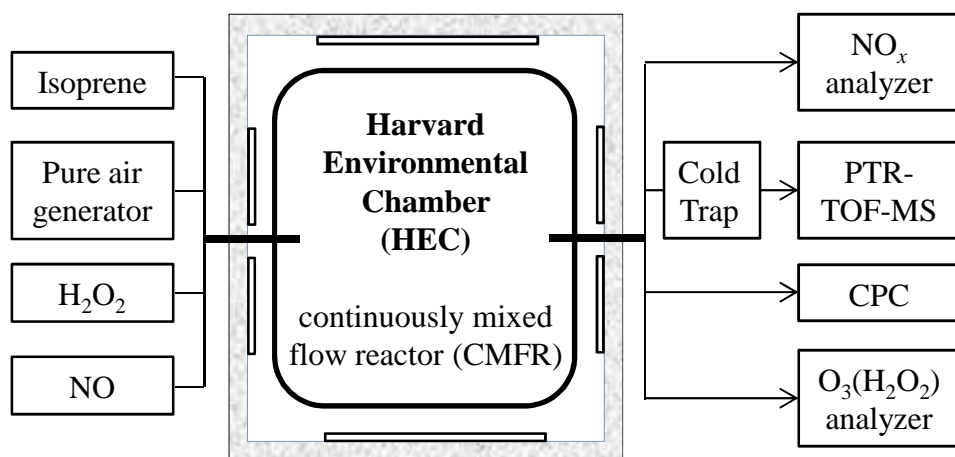

Figure S1

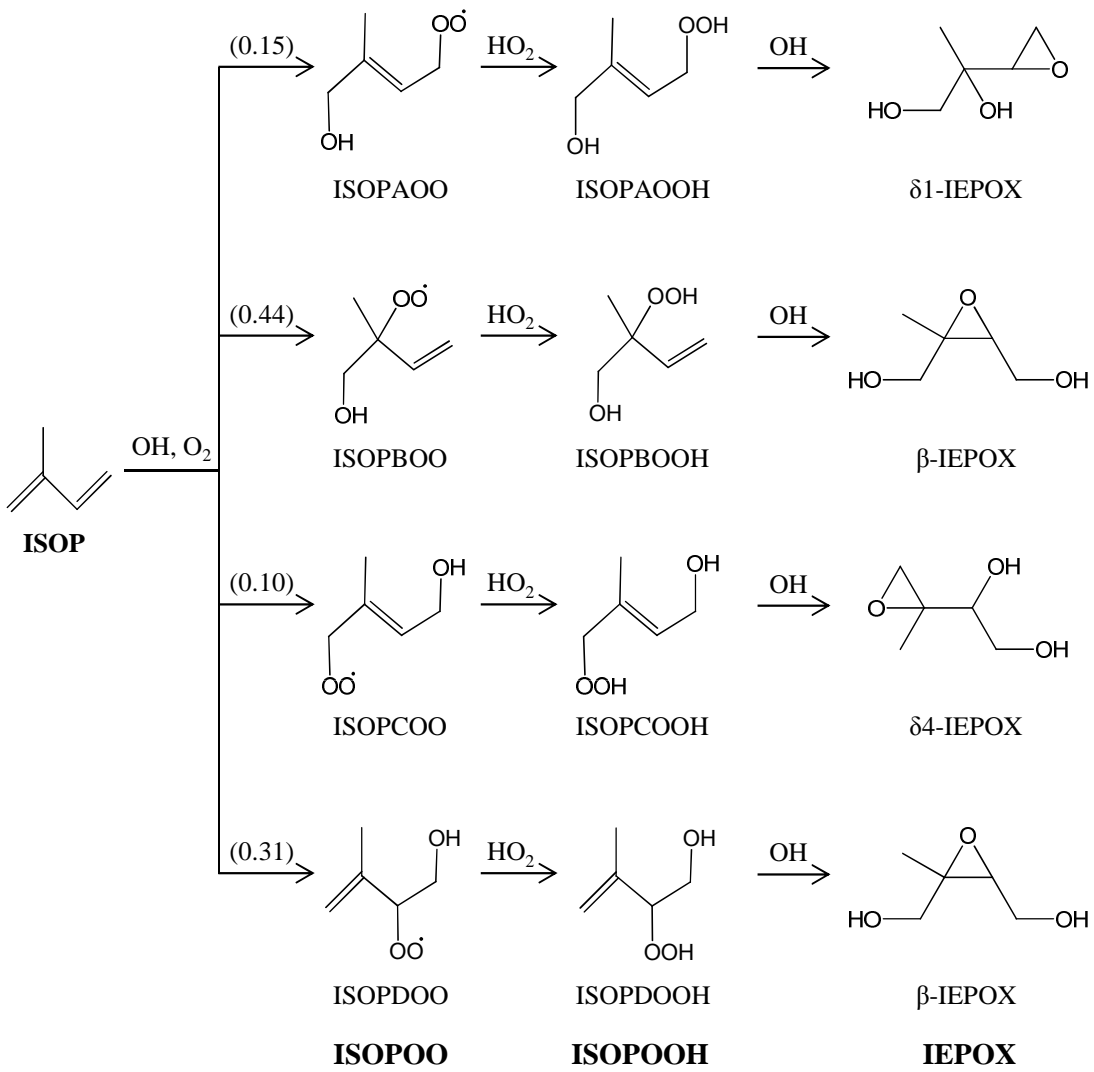

Figure S2

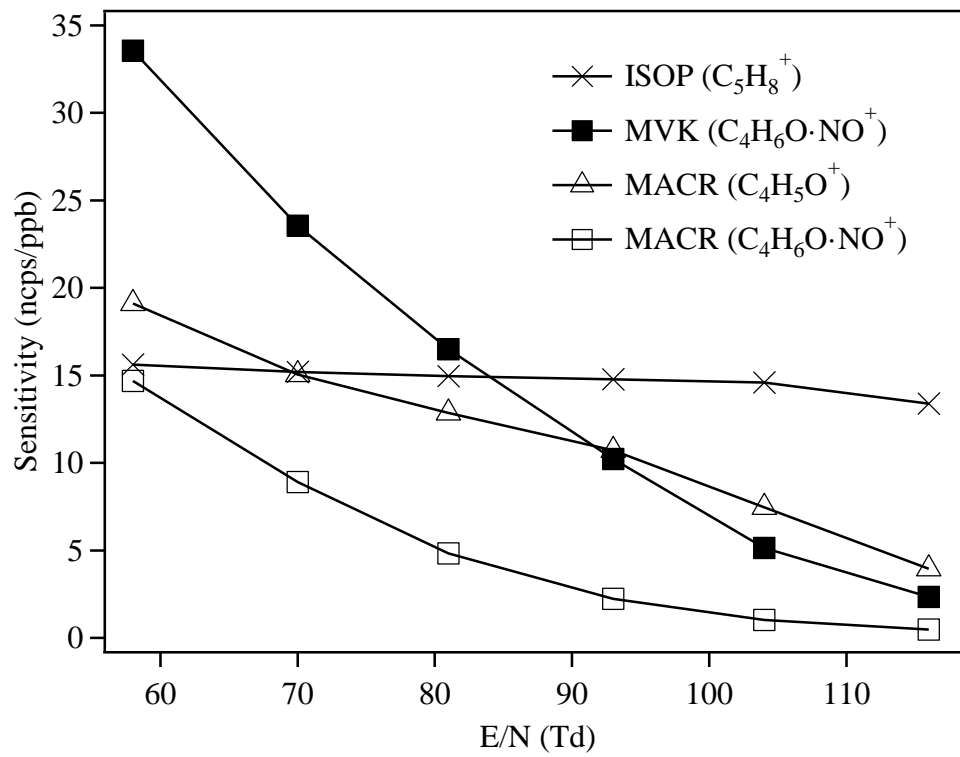

Figure S3

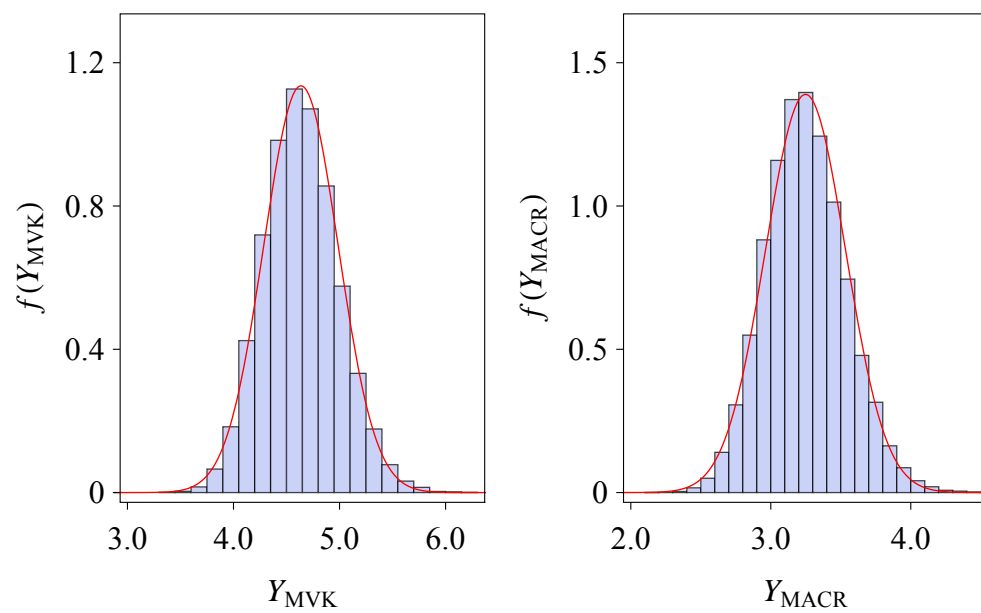

Figure S4

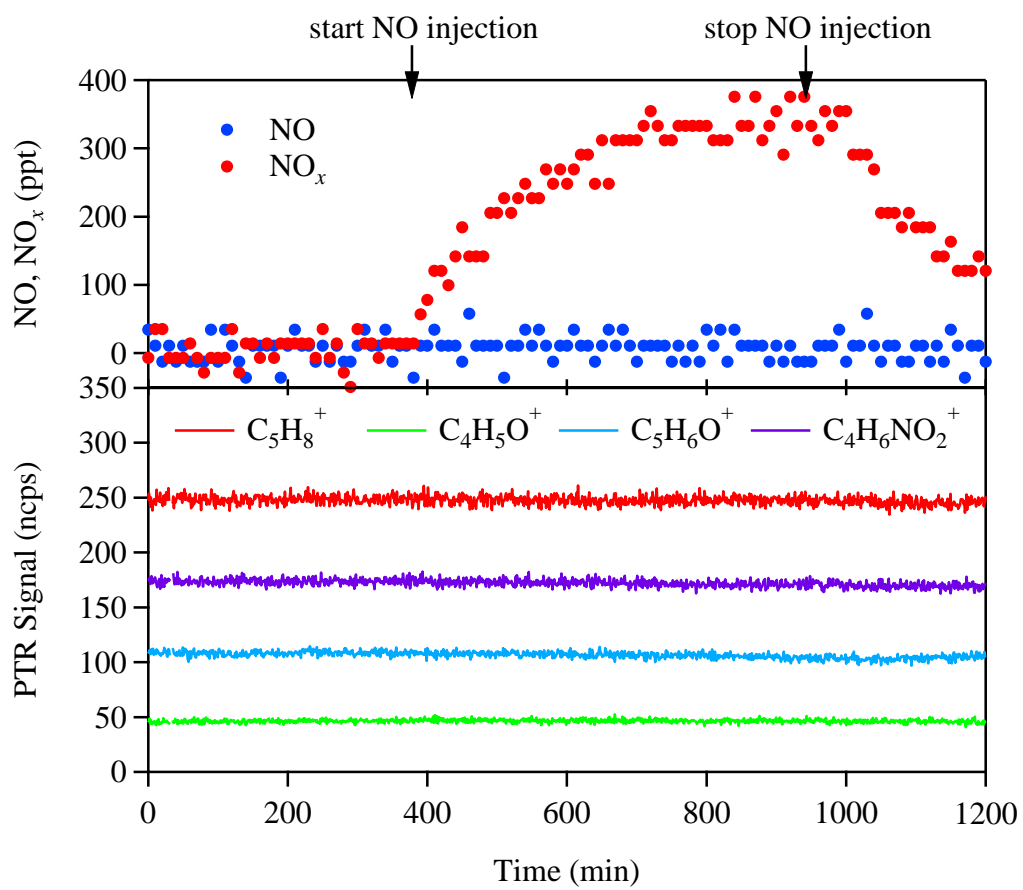

Figure S5



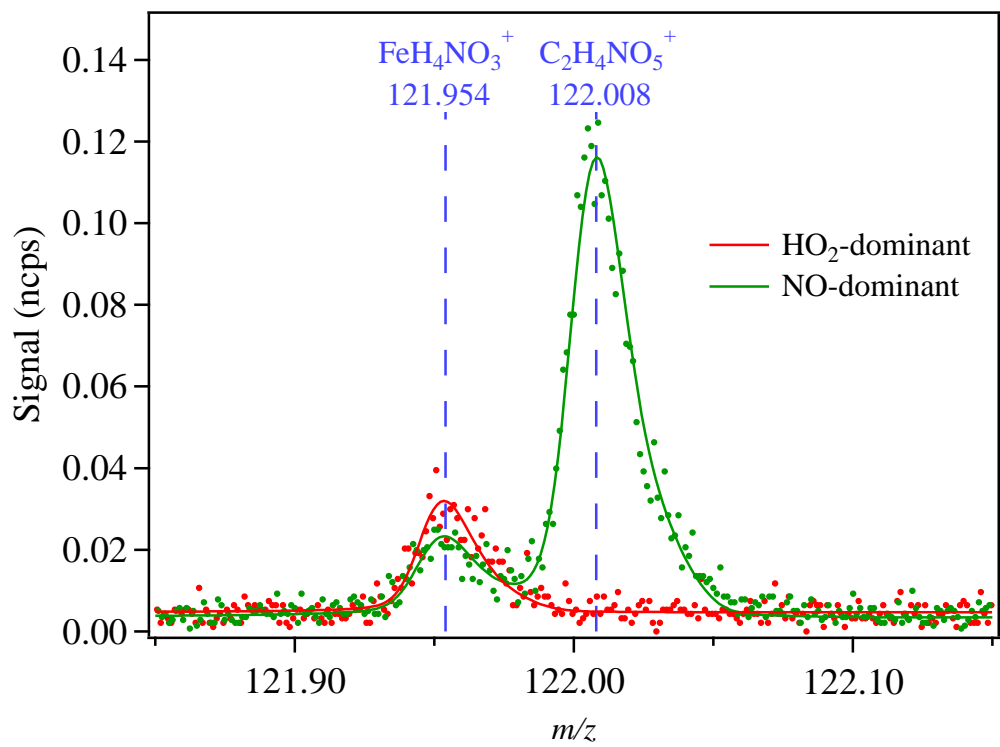

Figure S6

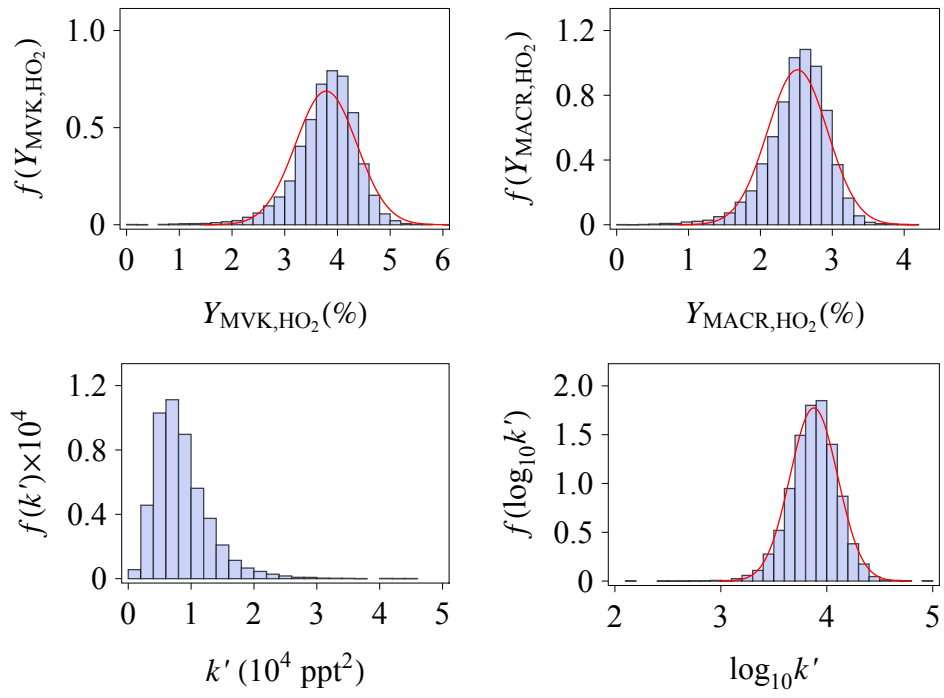

Figure S7

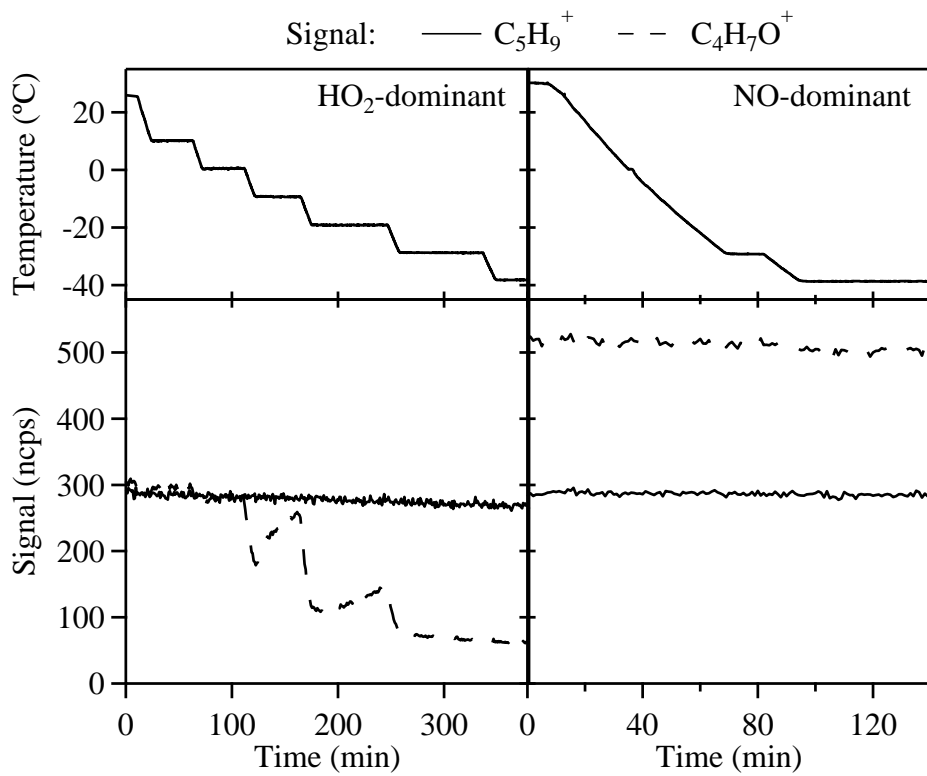

Figure S8

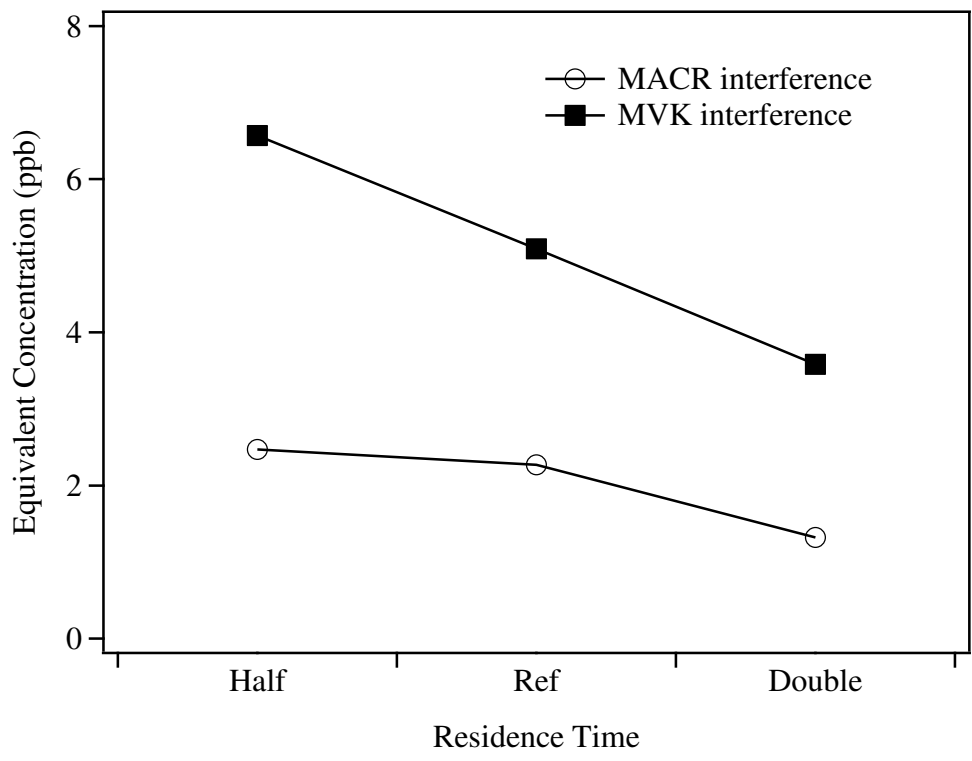

Figure S9

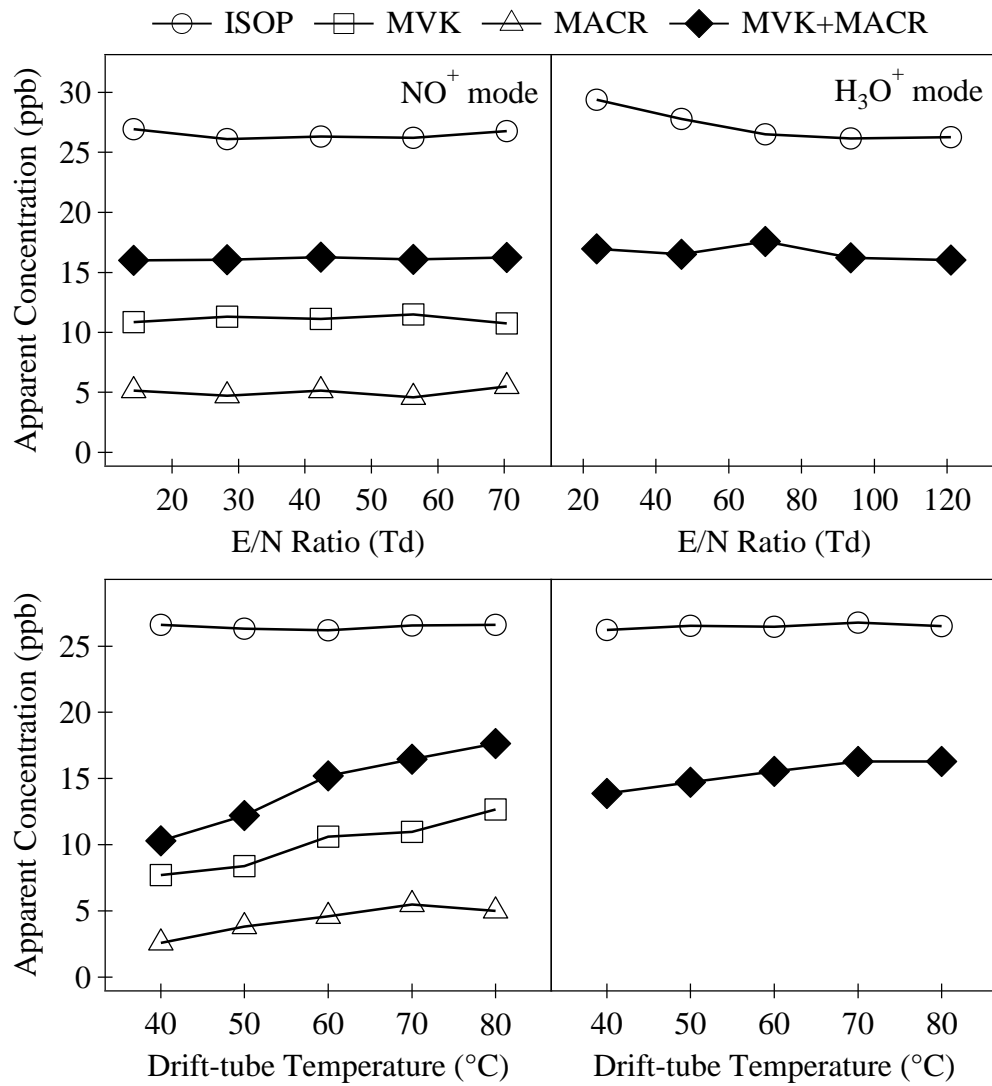

Figure S10
